# Supplementary material for: Efficient analysis of pharmaceutical drug substances and products using a solid-state NMR CryoProbe
Source: Royal Society of Chemistry journal article supplement (doi:10.1039/d2an01903e), 2023-01-01
Supplement: d2an01903e1.pdf [file d2an01903e1.pdf]

## Supporting Information

### Efficient Analysis of Pharmaceutical Drug Substances and Products Using Solid-State NMR CryoProbe

Yong Du<sup>1</sup>, Jochem Struppe<sup>2</sup>, Barbara Perrone<sup>3</sup>, Alia Hassan<sup>3</sup> Anna Codina<sup>4</sup>, and Yongchao Su<sup>1,\*</sup>

<sup>1</sup>Analytical Research & Development, Merck & Co., Inc., Rahway, NJ 07065, United States

<sup>2</sup>Bruker Biospin Corporation, Billerica, MA 01821, United States

<sup>3</sup>Bruker Switzerland, 8117 Faellanden, Switzerland

<sup>4</sup>Bruker UK Ltd., Coventry, CV4 9GH

\*Corresponding author: Y.S.: [yongchao.su@merck.com](mailto:yongchao.su@merck.com)

**Table S1.** Experimental and sample parameters for 1D  $^1\text{H}$ - $^{13}\text{C}$  and  $^1\text{H}$ - $^{15}\text{N}$  CP spectra of crystalline POSA Form I using the 3.2 mm CryoProbe and a regular 4.0 mm MAS (**Figure 3**). These parameters are used for calculating  $^{13}\text{C}$  and  $^{15}\text{N}$  signal enhancement factors as described in **Equation 1**.

|     | S/N   |         | Weight (mg) |         | $B_0$ (T) |         | Number of Scans |         | Recycle Delay (s) |         |
|-----|-------|---------|-------------|---------|-----------|---------|-----------------|---------|-------------------|---------|
|     | Cryo  | Regular | Cryo        | Regular | Cryo      | Regular | Cryo            | Regular | Cryo              | Regular |
| C5  | 282.9 | 129.2   | 62.6        | 67.4    | 14.1      | 9.4     | 128             | 2048    | 5.7               | 5.7     |
| C50 | 347.7 | 139.7   |             |         |           |         |                 |         |                   |         |
| N21 | 45.3  | 21.5    |             |         |           |         | 2400            | 22000   | 5.7               | 12.0*   |
| N29 | 62.0  | 28.9    |             |         |           |         |                 |         |                   |         |

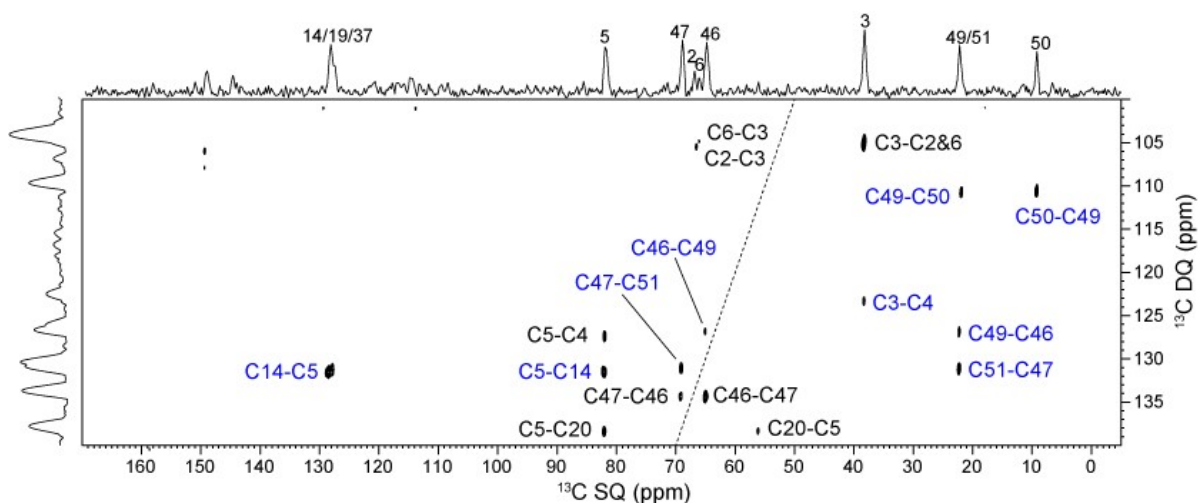

**Figure S1.** 2D  $^{13}\text{C}$ - $^{13}\text{C}$  rINADEQUATE spectrum of crystalline POSA Form I. The 1D  $^{13}\text{C}$  projections are displayed on the top and side. Note that the peaks color-labeled in blue result from the spectral folding.
